# Supplementary material for: Tailoring intermolecular interactions in ion gels with rationally designed phosphonic acid polymers
Source: Royal Society of Chemistry journal article supplement (doi:10.1039/d2py00646d), 2022-01-01
Supplement: d2py00646d1.pdf [file d2py00646d1.pdf]

**Supporting Information**

**Tailoring intermolecular interactions in ion gels with rationally designed  
phosphonic acid polymers**

Sejong Kang and Moon Jeong Park\*

Department of Chemistry, Pohang University of Science and Technology (POSTECH),

Pohang, Korea 790-784,

\* Corresponding author

(moonpark@postech.ac.kr)

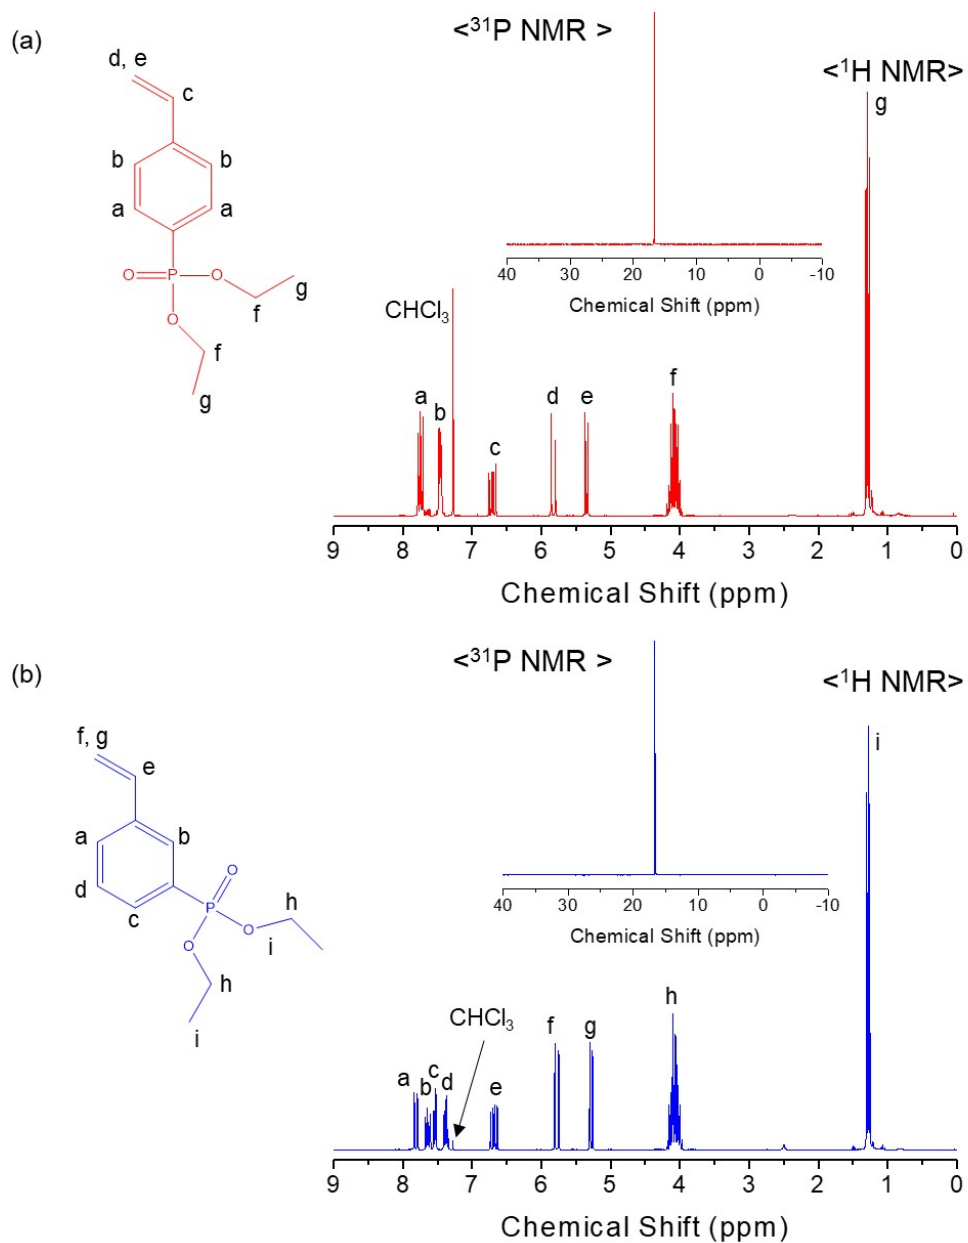

**Fig. S1**  $^1\text{H}$  and  $^{31}\text{P}$  NMR spectra of (a) diethyl 4-vinylbenzylphosphonate and (b) diethyl 3-vinylbenzylphosphonate in  $\text{CDCl}_3$ .

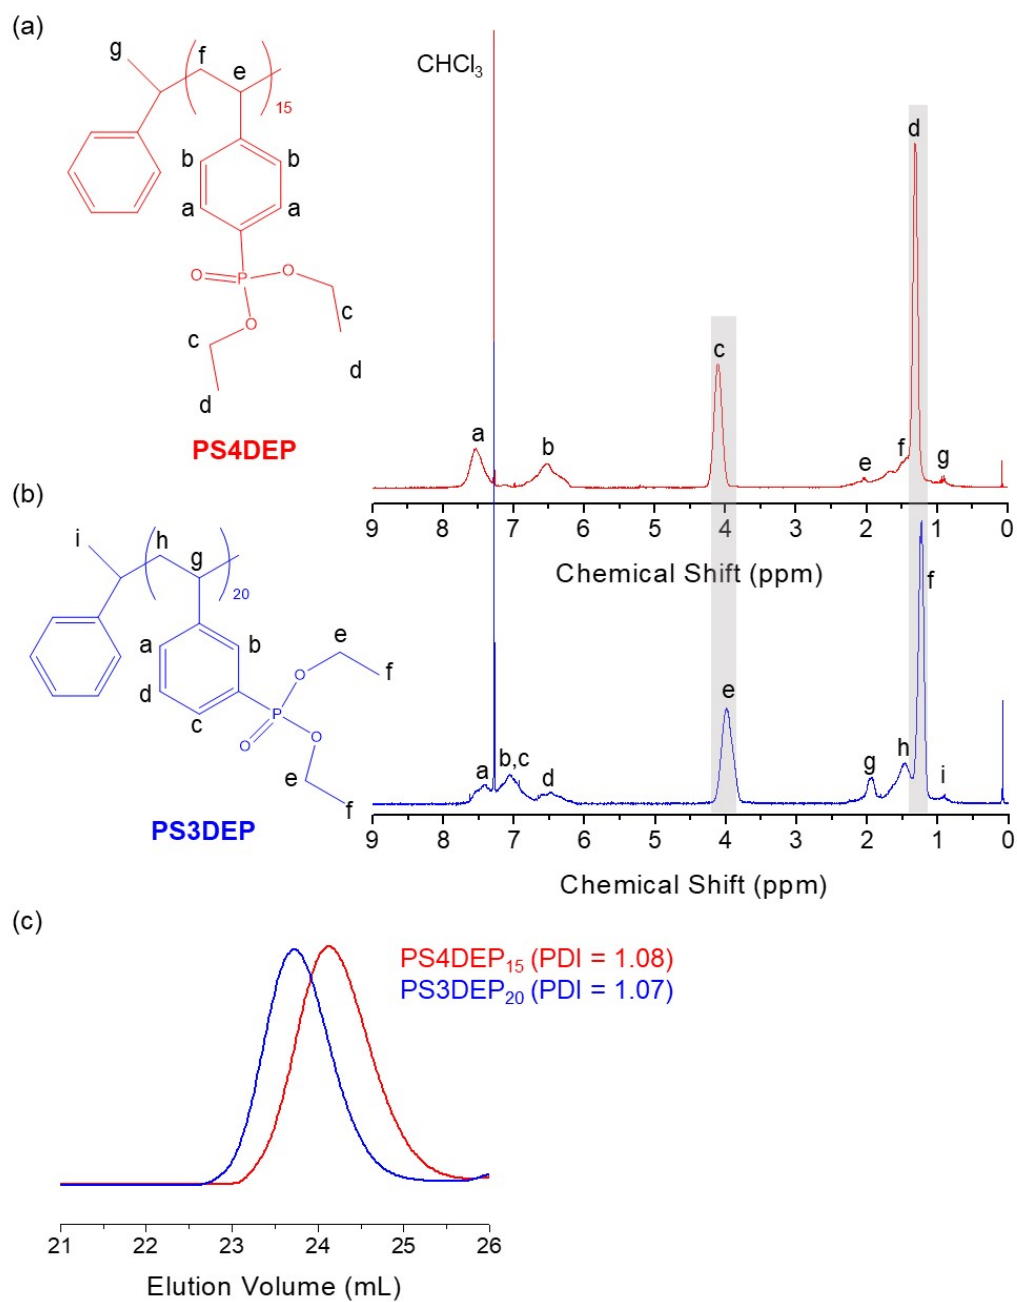

**Fig. S2**  $^1\text{H}$  NMR spectra of (a) PS4DEP and (b) PS3DEP in  $\text{CDCl}_3$ . (c) SEC traces and PDI values of PS4DEP and PS3DEP.

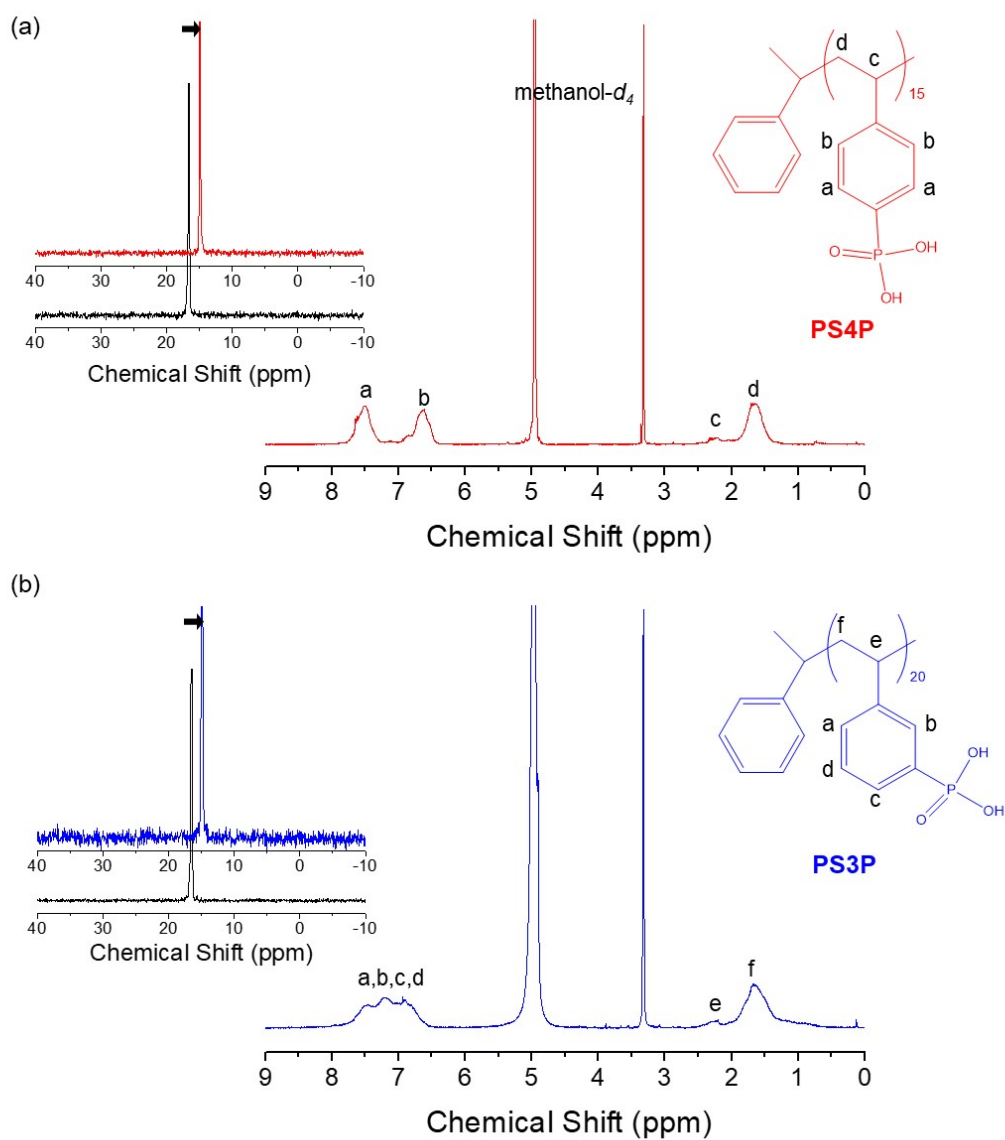

**Fig. S3** <sup>1</sup>H and <sup>31</sup>P NMR spectra of (a) PS4P and (b) PS3P in methanol-*d*<sub>4</sub>. Compared with <sup>31</sup>P NMR peaks of PS4DEP and PS3DEP in CDCl<sub>3</sub> (black line), those of PS4P and PS3P in methanol-*d*<sub>4</sub> shifted to upfield.

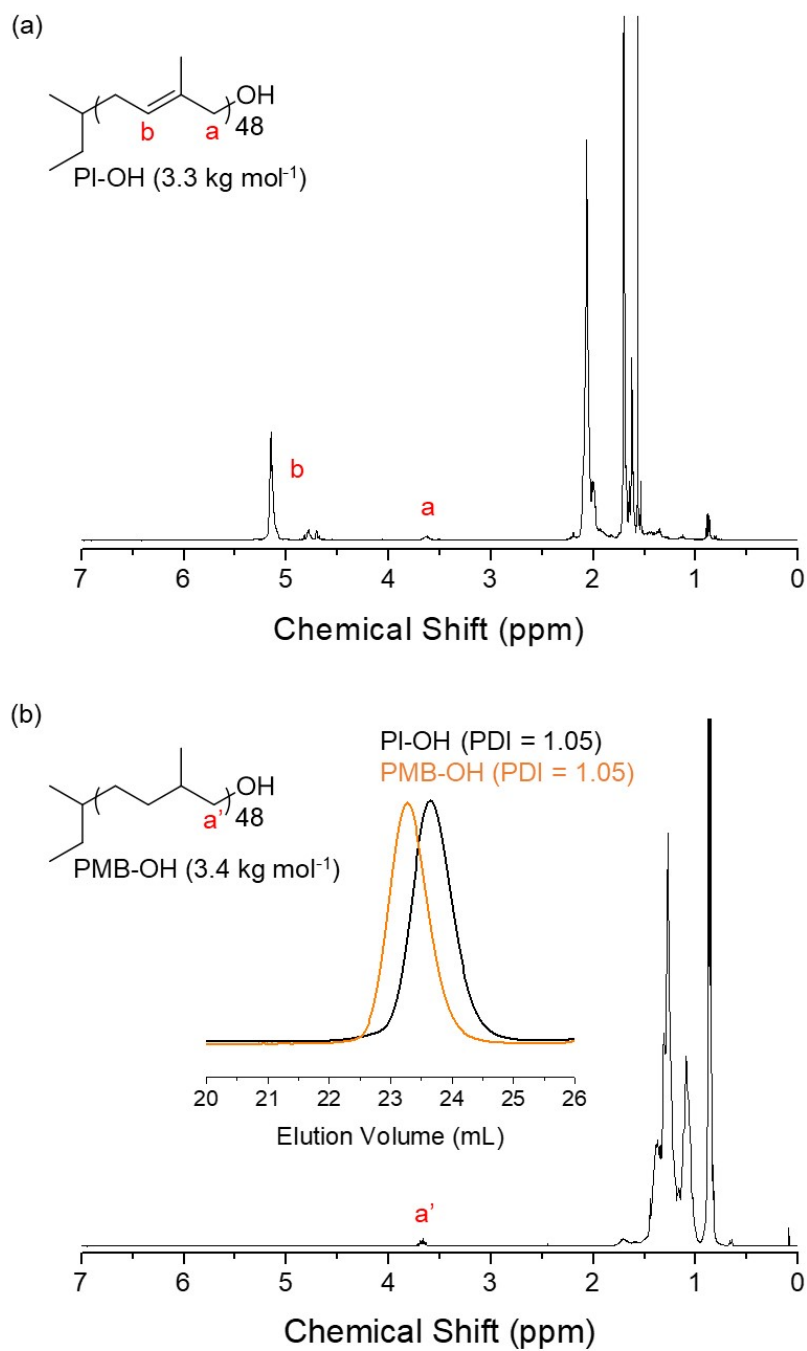

**Fig. S4** <sup>1</sup>H NMR spectra of (a) PI-OH and (b) PMB-OH in CDCl<sub>3</sub>. SEC traces of PI-OH and PMB-OH are shown in the inset of (b).

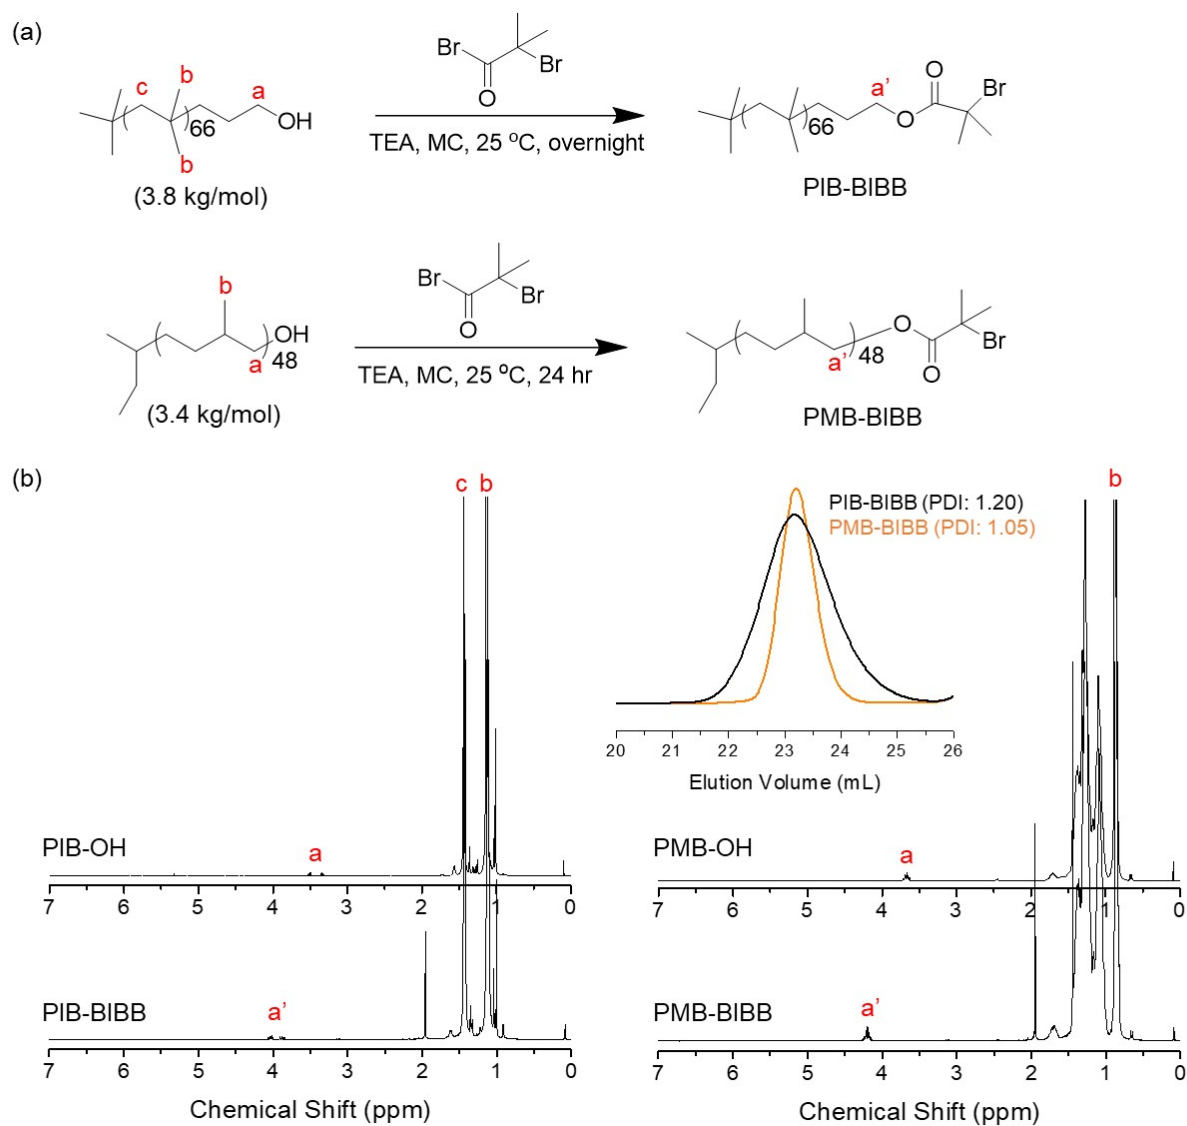

**Fig. S5** (a) Synthetic routes and (b)  $^1\text{H}$  NMR spectra of PIB-BIBB and PMB-BIBB macroinitiators. SEC traces and PDI values of PIB-BIBB and PMB-BIBB are shown in the inset of (b).

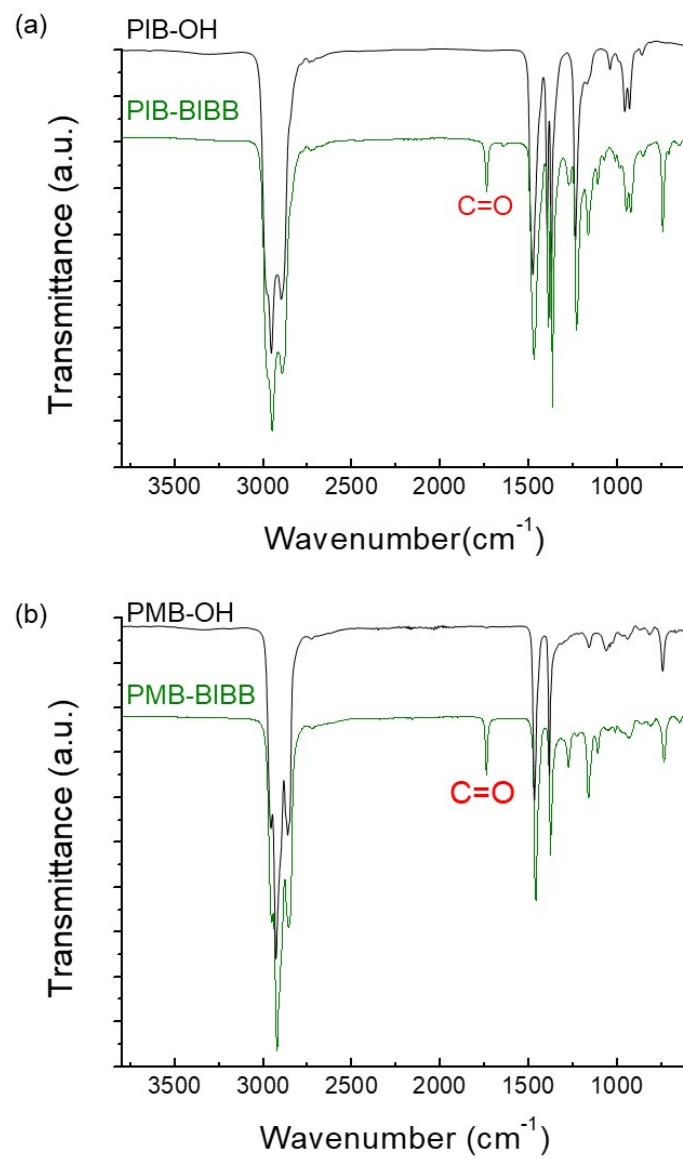

**Fig. S6** FT-IR spectra of (a) PIB-OH/PIB-BIBB and (b) PMB-OH/PMB-BIBB.

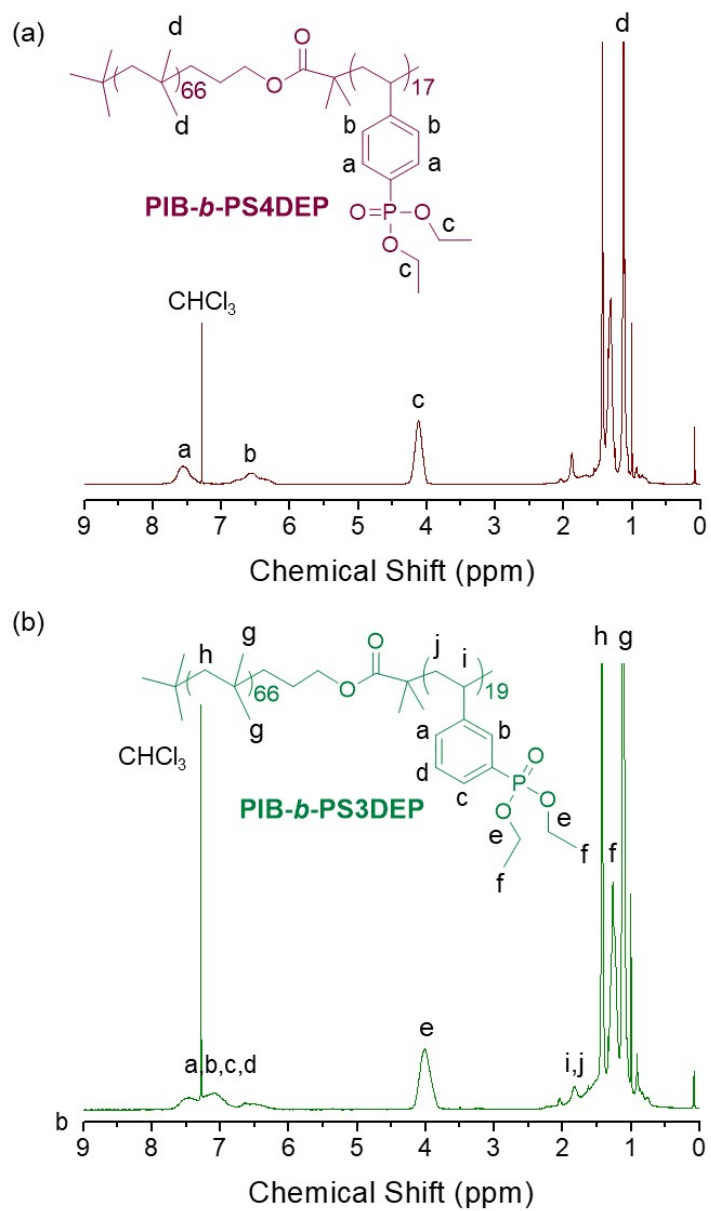

**Fig. S7** Representative <sup>1</sup>H-NMR spectra of (a) PIB-*b*-PS4DEP and (b) PIB-*b*-PS3DEP in CDCl<sub>3</sub>.



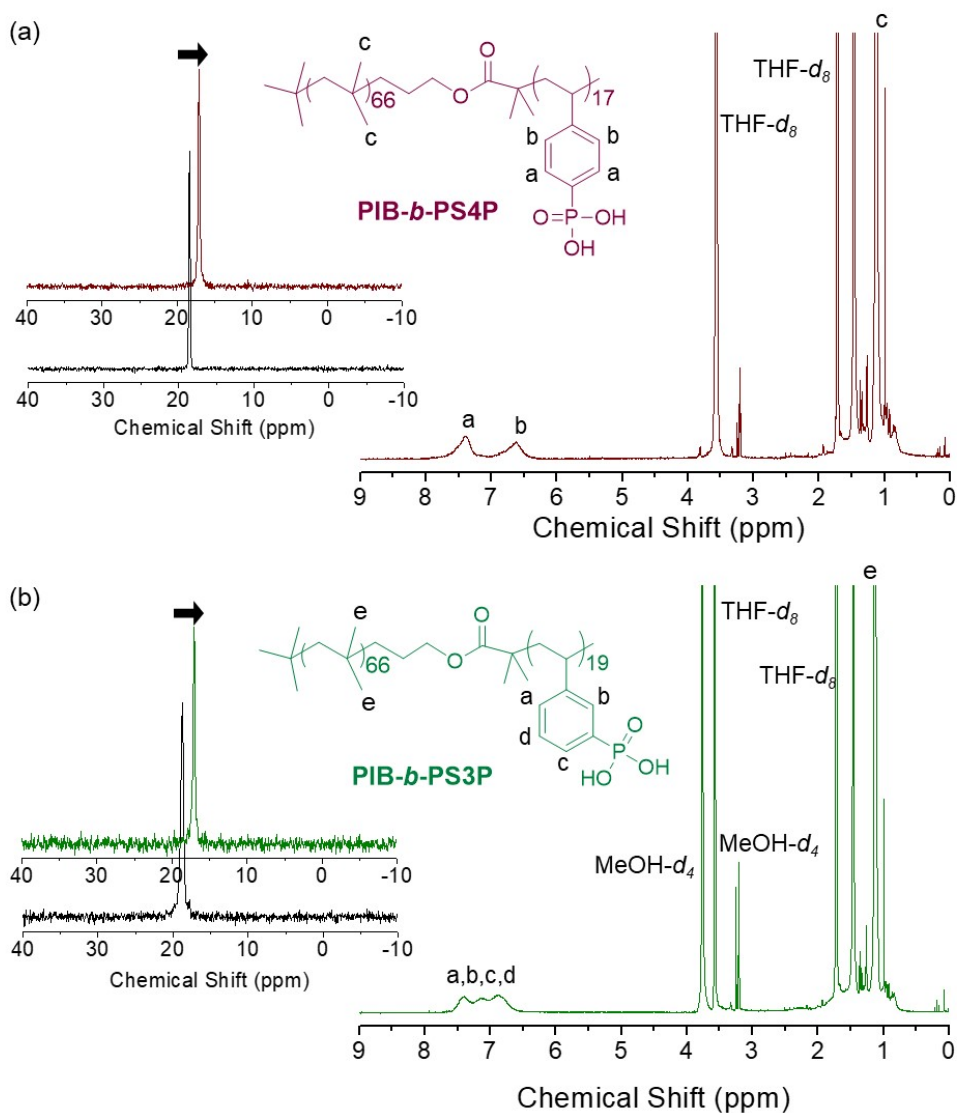

**Fig. S8** <sup>1</sup>H-NMR and <sup>31</sup>P-NMR spectra of (a) PIB-*b*-PSP and (b) PIB-*b*-PS3P in methanol-*d*<sub>4</sub>/THF-*d*<sub>8</sub>. Compared with <sup>31</sup>P NMR peaks of PIB-*b*-PS4DEP (black) and PIB-*b*-PS3DEP (black), those of PIB-*b*-PS4P (brown) and PIB-*b*-PS3P (green) shifted to upfield.

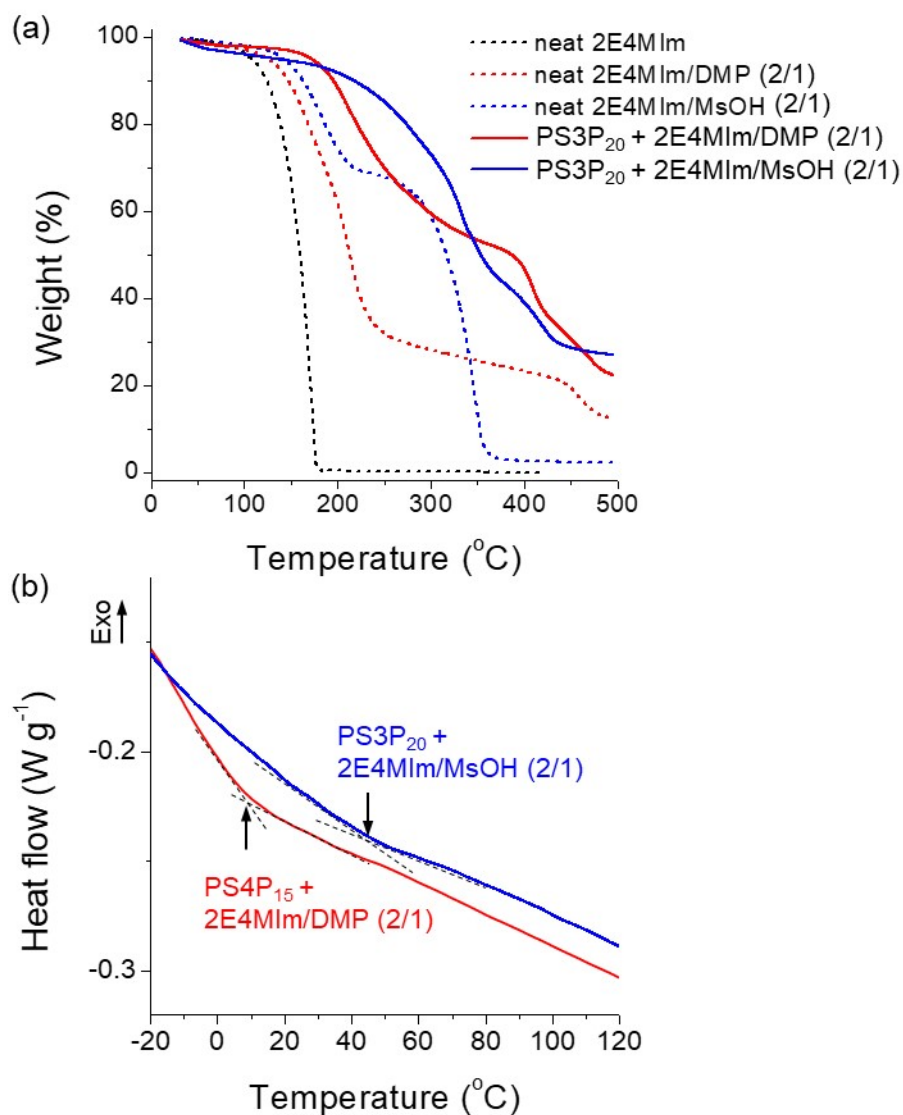

**Fig. S9** (a) TGA thermograms of neat 2E4MIm, neat 2E4MIm/MsOH (2/1), neat 2E4MIm/DMP (2/1) (dotted lines), and those of PS3P ion gels comprising 2E4MIm/MsOH (2/1) and 2E4MIm/DMP (2/1) (solid lines). (b) Representative DSC thermograms of PS3P<sub>20</sub> doped with 2E4MIm/MsOH (2/1) and PS4P<sub>15</sub> doped with 2E4MIm/DMP (2/1). The heating rate was 10 °C/min.

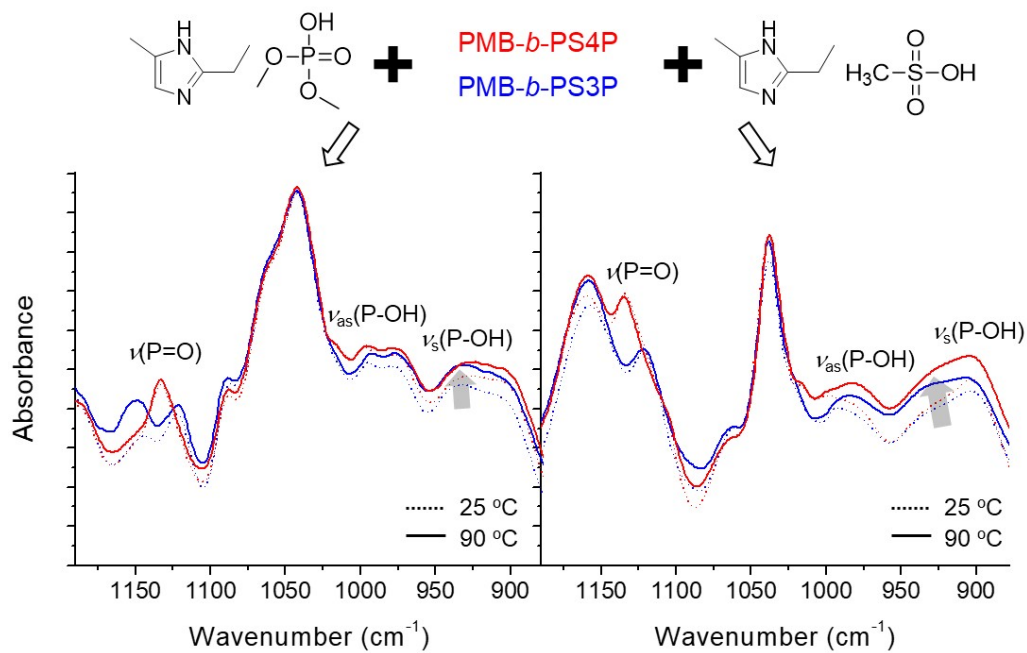

**Fig. S10** FT-IR spectra of PMB-*b*-PS4P (red) and PMB-*b*-PS3P (blue) comprising different ionic liquids, measured at 25 °C (dotted lines) and at 90 °C (solid line) in the wavenumber range of 1190-850 cm<sup>-1</sup>.

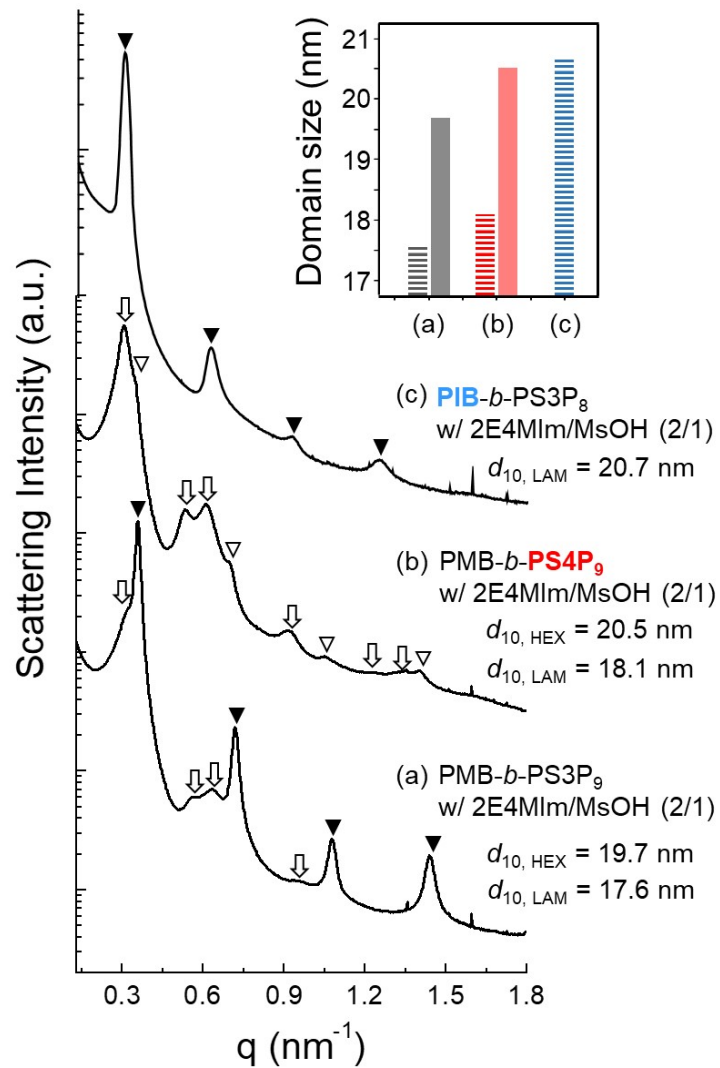

**Fig. S11** SAXS profiles of (a) PMB-*b*-PS3P<sub>9</sub>, (b) PMB-*b*-PS4P<sub>9</sub>, and (c) PIB-*b*-PS3P<sub>8</sub> block copolymers comprising 2E4MIm/MsOH. The domain size of each ion gel is shown in the inset plot.

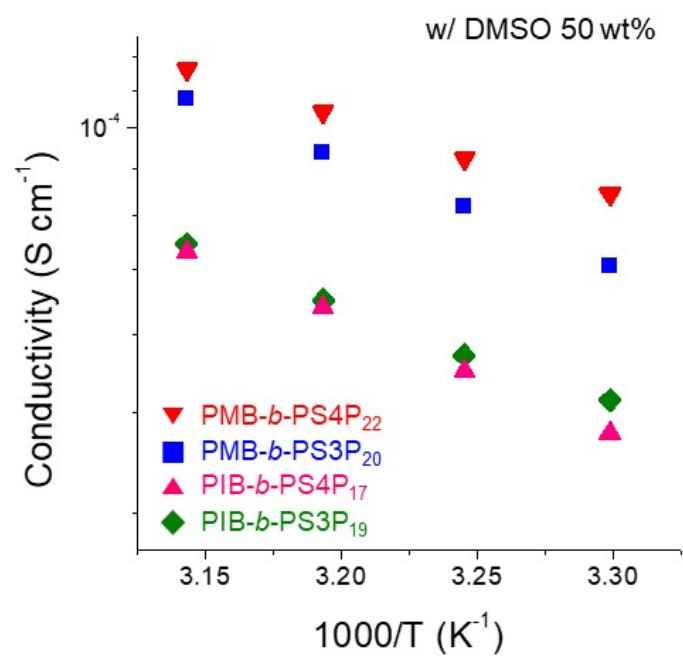

**Fig. S12** Temperature-dependent ionic conductivities of four sets of block copolymers of PMB-*b*-PS4P<sub>22</sub>, PMB-*b*-PS3P<sub>20</sub>, PIB-*b*-PS4P<sub>17</sub>, and PIB-*b*-PS3P<sub>19</sub> containing DMSO (50 wt%).
